# Supplementary material for: Ultra-sensitive, tumor-informed ctDNA profiling in pembrolizumab-treated esophagogastric cancer patients predicts clinical responses
Source: Research Square preprint supplement (doi:10.21203/rs.3.rs-5349536/v1), 2024-12-18
Supplement: Supplementary file 1 [file aa1275cb2b26703c83ff64ef.docx]

*Supplement Figure 1. Collection of plasma samples at baseline (C1D1), on treatment (C1D8 to C19D1), at RECIST progression (Prog), and 30 days post-progression (30Day). Each tick mark represents the time of collection of a plasma sample in days from baseline (C1D1).*


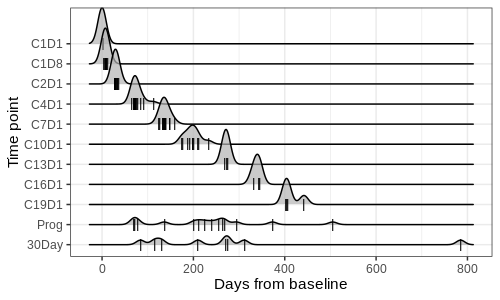


*Supplement Figure 2. Quality of baseline FFPE tumor samples. A) Tumor fraction estimation. Dashed line denotes threshold for exclusion from the analysis cohort. Each dot represents a tumor sample that was above (gray) or below (red) this threshold and therefore included (gray) or excluded (red) from the analysis. B) Fragment length distribution for samples that were included (gray) or excluded (red) from the analysis.*

A. B.


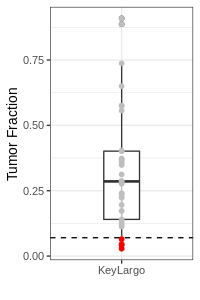

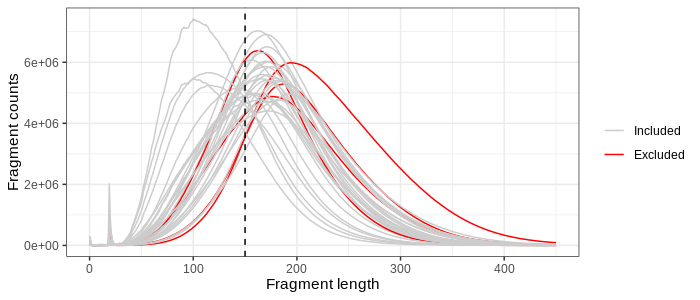


*Supplement Figure 3. Simulation of non-ultrasensitive method for ctDNA detection. Kaplan-Meier and univariable Cox regression analysis of A) PFS and B) OS for patients split by simulated ctDNA clearance (PPM ≤ 100) between baseline and C7D1.*


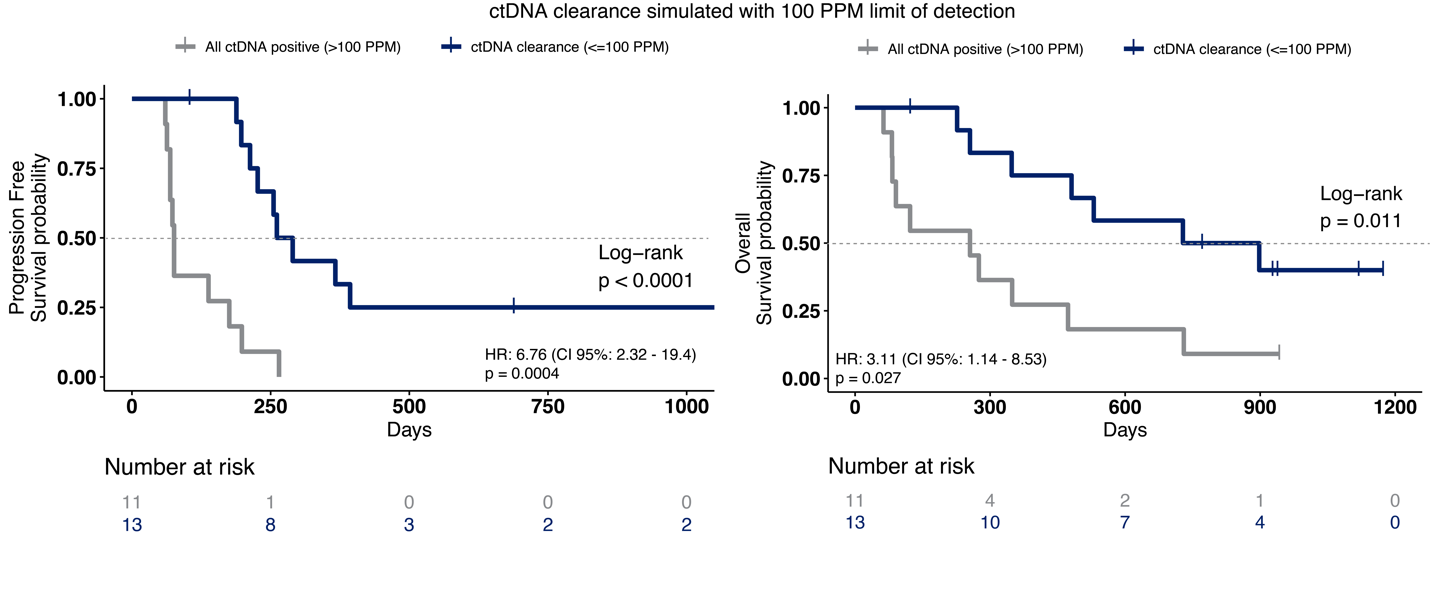


*Supplemental Table 1. Patient characteristics.*

| **Demographics** | **Total patients in KeyLargo study**  **(n=36)** | **Patients in KeyLargo ctDNA analysis**  **(n=25)** |
| --- | --- | --- |
| Age, median (range) | 60  (34-78) | 61  (34-76) |
| Male, n (%)  Female, n (%) | 30 (83)  6 (17) | 21 (84)  4 (16) |
| Primary Site, n (%)  Esophagus  GEJ  Gastric  Not available | 9 (26)  18 (53)  7 (21)  2 | 5 (22)  15 (65)  3 (13)  2 |
| Sites of metastasis, n (%)  Lymph node  Liver  Lung  Carcinomatosis  LN ***only***  Other | 29 (81)  16 (44)  9 (25)  4 (11)  4 (11)  11 (31) | 20 (80)  13 (52)  7 (28)  2 (8)  2 (8)  7 (28) |
| Primary in place, n (%) | 23 (64) | 16 (64) |

*Supplement Table 2. Quality of DNA extracted from FFPE tumor specimens. BOR: best overall response; DIN: DNA integrity number.*

| ***Patient ID*** | ***BOR*** | ***Total DNA amount post-extraction (ng)*** | ***DIN*** | ***Tumor content*** | ***Status*** |
| --- | --- | --- | --- | --- | --- |
| *109* | *CR* | *2126.1* | *5.6* | *0.5565* |  |
| *111* | *CR* | *874.95* | *5.1* | *0.7374* |  |
| *131* | *NA* | *1479.15* | *6* | *0.1318* |  |
| *118* | *PD* | *178.98* | *3.9* | *0.365* |  |
| *127* | *PD* | *3927.3* | *5.5* | *0.357* |  |
| *133* | *NA* | *334.59* | *5.4* | *0.2234* |  |
| *135* | *PD* | *556.89* | *2.3* | *0.2401* |  |
| *139* | *PD* | *1151.4* | *5.6* | *0.5756* |  |
| *140* | *PD* | *1721.4* | *5.5* | *0.229* |  |
| *106* | *PR* | *157.89* | *2.8* | *0.6498* |  |
| *108* | *PR* | *2063.4* | *3.5* | *0.2765* |  |
| *117* | *PR* | *2257.2* | *4.4* | *0.3122* |  |
| *119* | *PR* | *4400.4* | *3.8* | *0.2874* |  |
| *122* | *PR* | *145* | *3.5* | *0.3686* |  |
| *125* | *PR* | *97.19* | *4.9* | *0.4013* |  |
| *129* | *PR* | *909.15* | *5.8* | *0.8872* |  |
| *132* | *PR* | *5517.6* | *4.4* | *0.5745* |  |
| *136* | *PR* | *176.7* | *4.7* | *0.04789* |  |
| *141* | *PR* | *1037.4* | *4.2* | *0.2384* |  |
| *501* | *PR* | *308.09* | *2.5* | *0.4037* |  |
| *502* | *PR* | *440.04* | *4.1* | *0.1957* |  |
| *503* | *PR* | *211.47* | *2.6* | *0.2856* |  |
| *121* | *SD* | *957.6* | *5.5* | *0.3731* |  |
| *128* | *SD* | *3049.5* | *3.1* | *0.9094* |  |
| *130* | *SD* | *114* | *2.4* | *0.1226* |  |
| *120* | *PD* | *133.2* | *3.4* | *0.04154* | *LOW TUMOR CONTENT* |
| *114* | *PR* | *479.37* | *5.1* | *0.06468* | *LOW TUMOR CONTENT* |
| *101* | *CR* | *31.12* | *3.3* | *NA* | *INSUFFICIENT DNA* |
| *105* | *CR* | *46.97* | *3* | *NA* | *INSUFFICIENT DNA* |
| *112* | *CR* | *NA* | *NA* | *NA* | *INSUFFICIENT DNA* |
| *126* | *CR* | *14.82* | *3.5* | *NA* | *INSUFFICIENT DNA* |
| *103* | *PR* | *1* | *0* | *NA* | *INSUFFICIENT DNA* |
| *107* | *PR* | *NA* | *NA* | *NA* | *NO BLOCK* |
| *123* | *PR* | *NA* | *NA* | *NA* | *NO BLOCK* |
| *134* | *PR* | *NA* | *NA* | *NA* | *NO BLOCK* |
| *104* | *SD* | *NA* | *NA* | *NA* | *NO BLOCK* |
